# Supplementary material
Source: MDPI journal article supplement (https://www.mdpi.com/2571-6255/6/8/304)
Supplement: s1 [file s1]

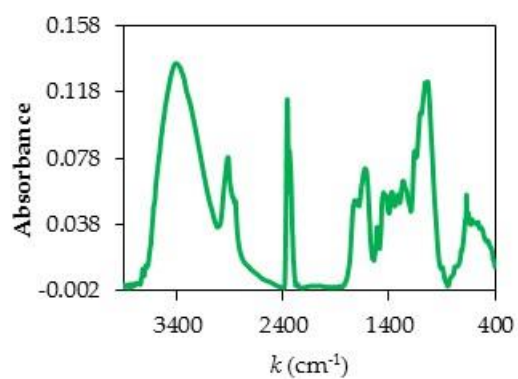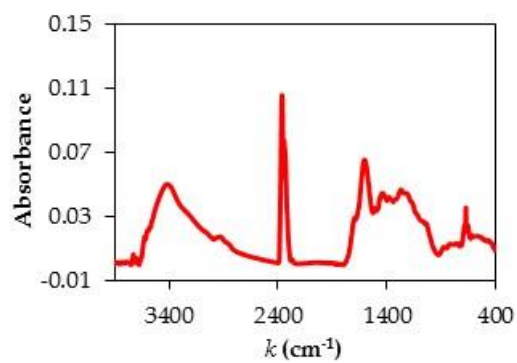

Down wood

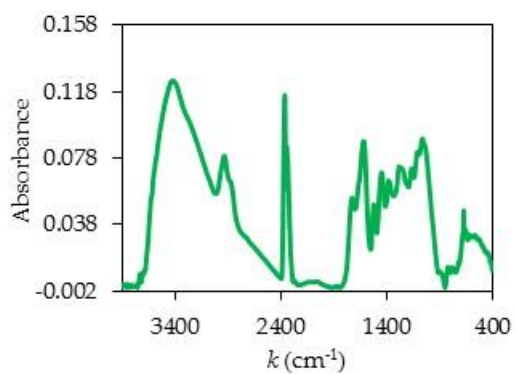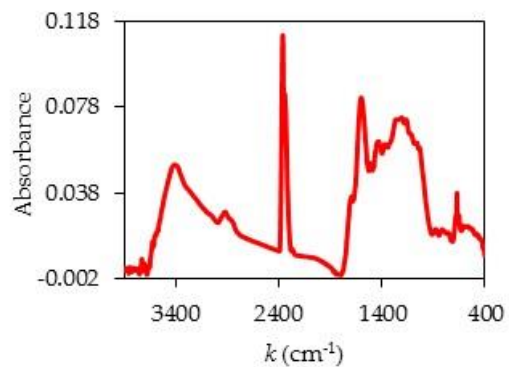

Cone

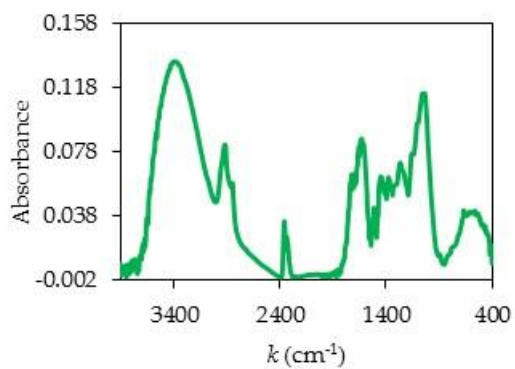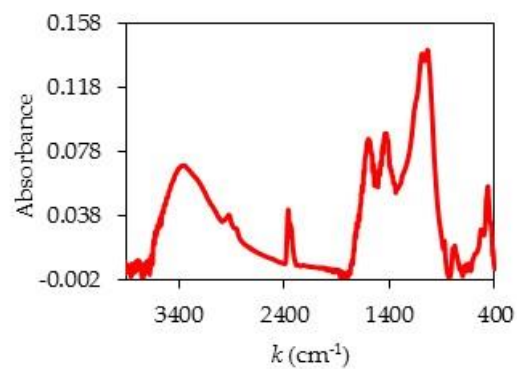

Forest floor

**Figure S1.** FTIR spectra of unburned fuels (**left**) and PyOM (**right**) in Scots pine forest. Note:  $k$  – wavenumber.

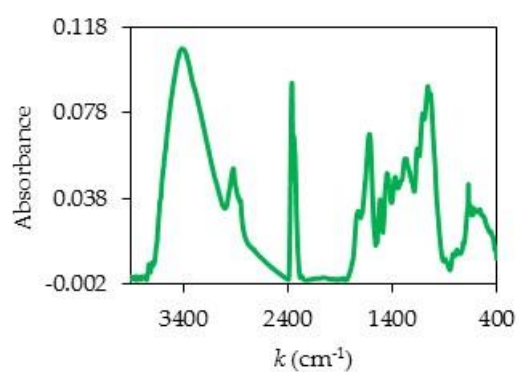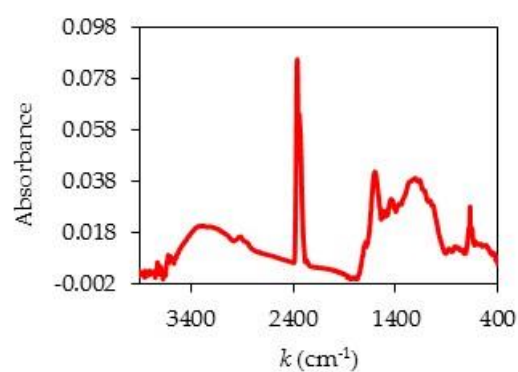

Bark

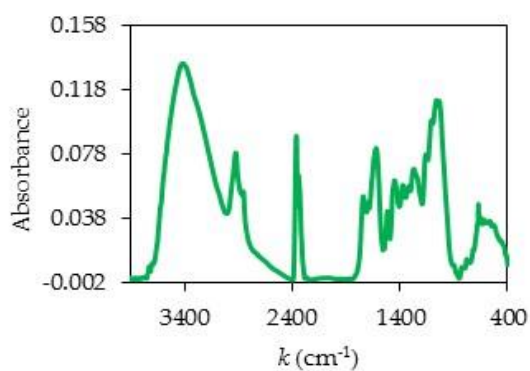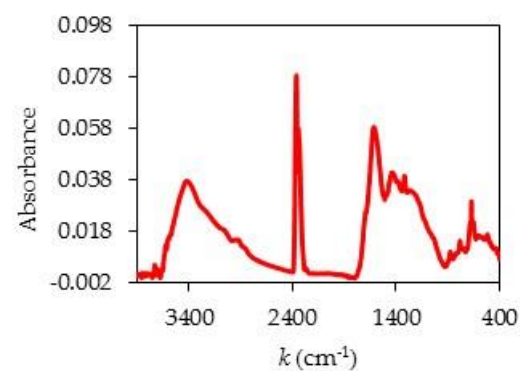

Down wood

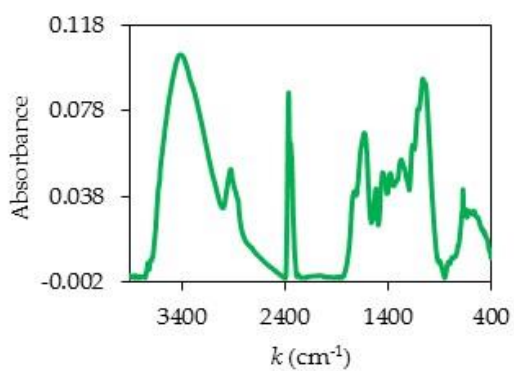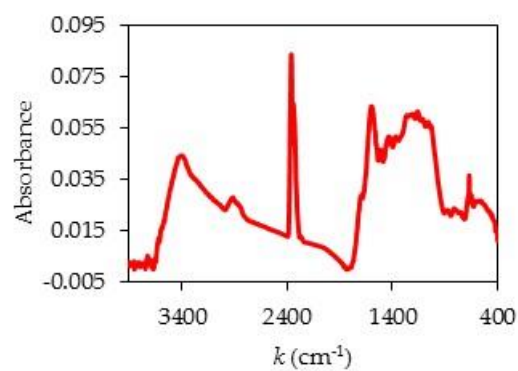

Cone

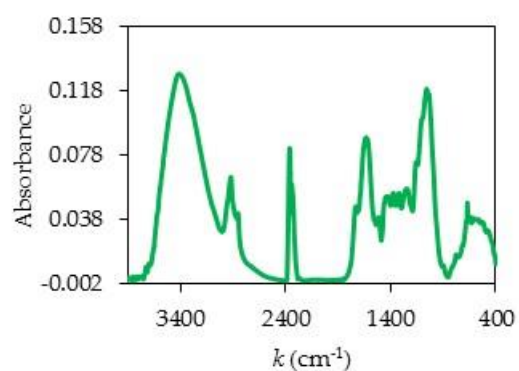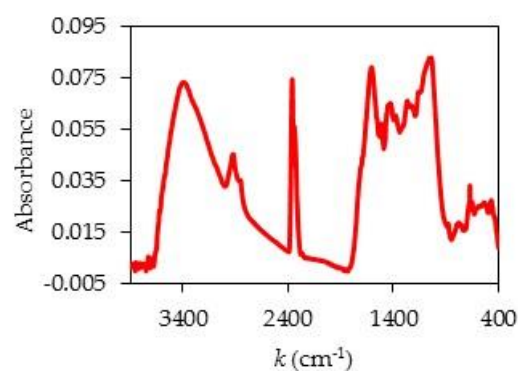

Forest floor

**Figure S2.** FTIR spectra of unburned fuels (**left**) and PyOM (**right**) in larch forest. Note:  $k$  – wavenumber.

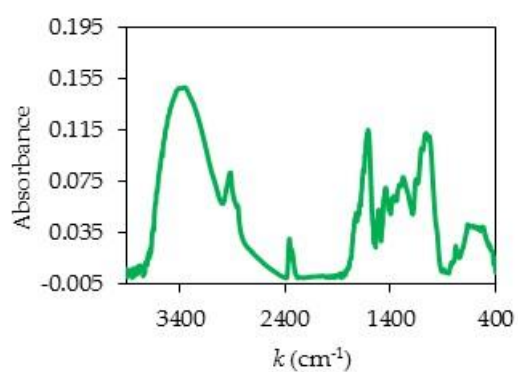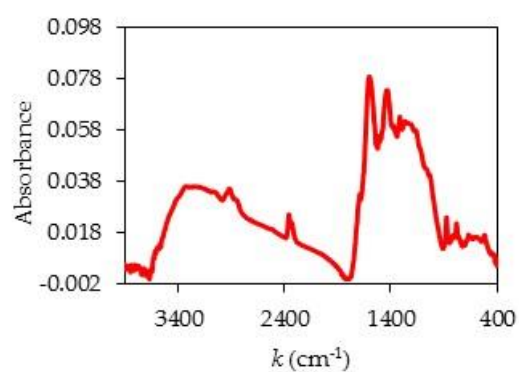

Bark

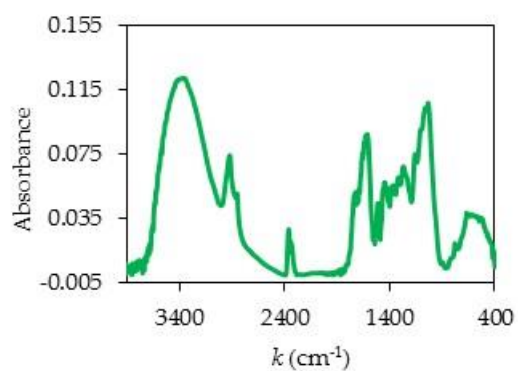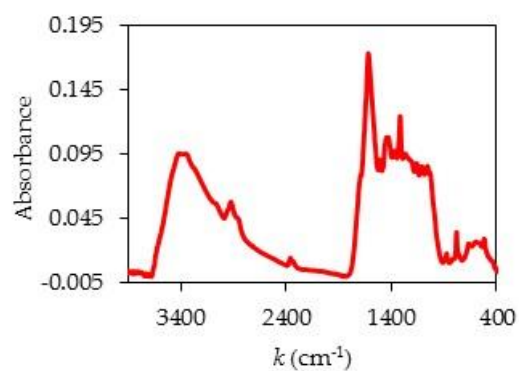

Down wood

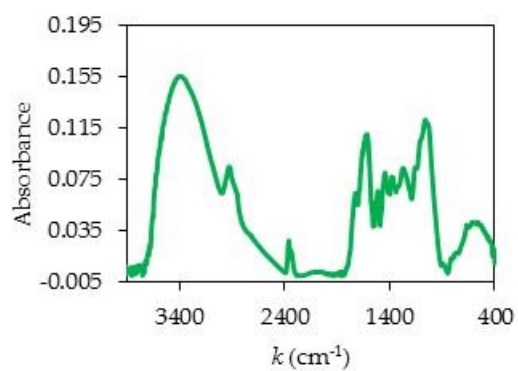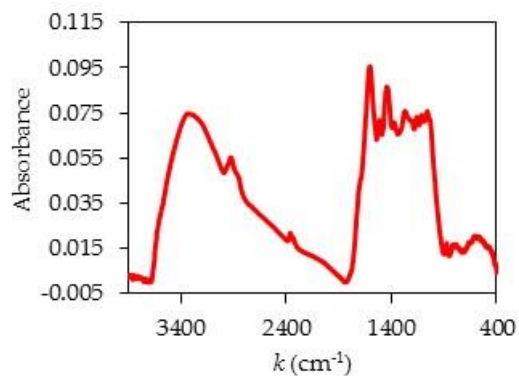

Cone

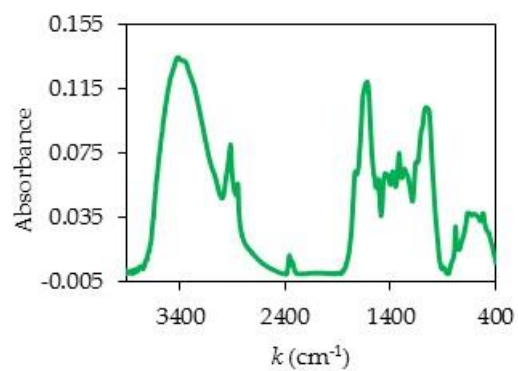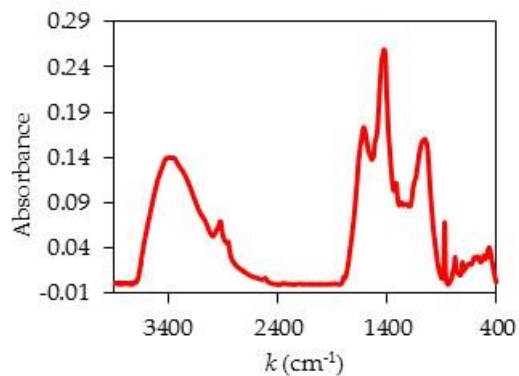

Forest floor

**Figure S3.** FTIR spectra of unburned fuels (**left**) and PyOM (**right**) in spruce forest. Note:  $k$  – wavenumber.

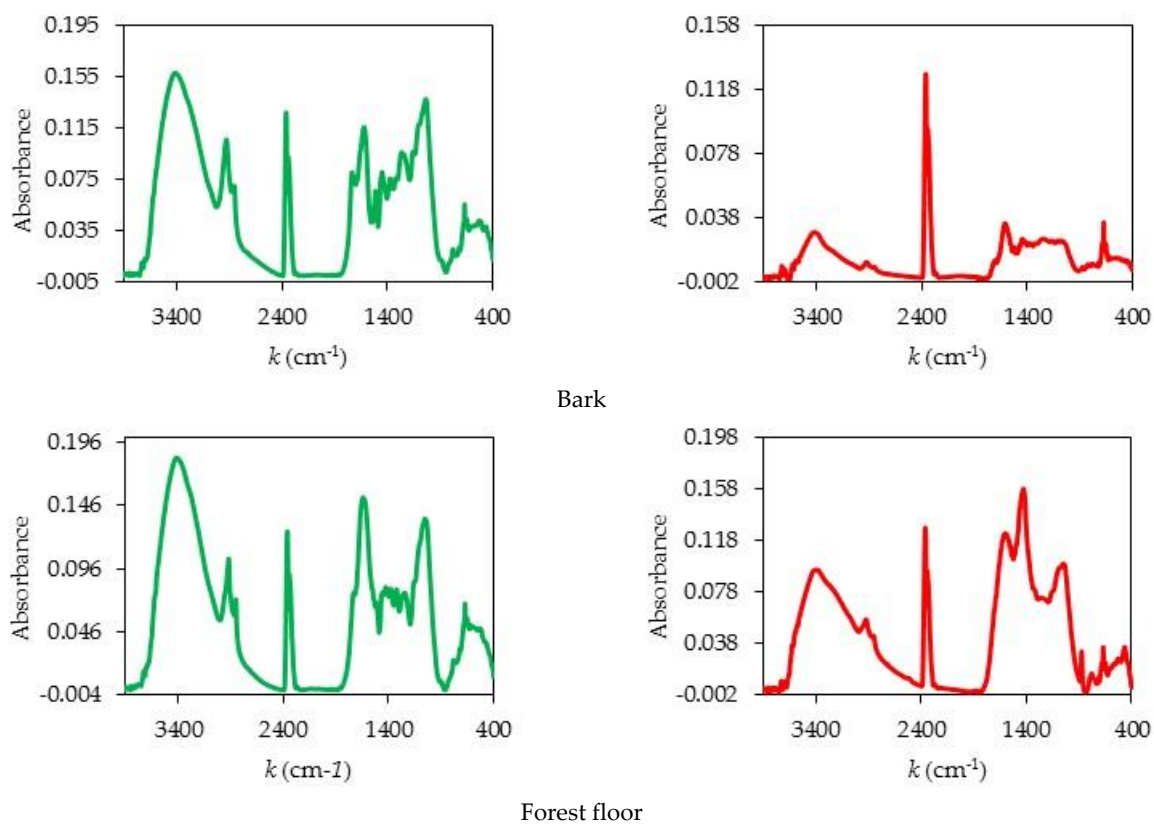

**Figure S4.** FTIR spectra of unburned fuels (**left**) and PyOM (**right**) in birch forest. Note:  $k$  – wavenumber
